## Thyroid Hemiagenesis: Incidence, Clinical Significance, and Genetic Background

Ewelina Szczepanek-Parulska,<sup>1</sup> Ariadna Zybek-Kocik,<sup>1</sup> Leonard Wartofsky,<sup>2</sup> and Marek Ruchała<sup>1</sup>

<sup>1</sup>Department of Endocrinology, Metabolism and Internal Medicine, Poznan University of Medical Sciences, 60-355 Poznan, Poland; and <sup>2</sup>Department of Medicine, Washington Hospital Center, Washington, District of Columbia 20010

**Context:** Thyroid hemiagenesis (THA) constitutes a rare, congenital disorder that is characterized by an absence of one thyroid lobe. Because the pathogenesis and clinical significance of this malformation remain undefined, specific clinical recommendations are lacking, especially for asymptomatic cases.

**Evidence Acquisition:** The PubMed database was searched (years 1970 to 2017), and the following terms were used to retrieve the results: “thyroid hemiagenesis,” “thyroid hemiopia,” “one thyroid lobe agenesis,” and “one thyroid lobe aplasia.” Subsequently, reference sections of the retrieved articles were searched.

**Evidence Synthesis:** There is a noticeable susceptibility of subjects with THA to develop additional thyroid and nonthyroidal pathologies. In pathogenesis of concomitant thyroid pathologies, a chronic elevation in thyroid-stimulating hormone values may play an important role. Thus far, genetic studies failed to find a common genetic background of the anomaly, and the potential underlying cause was identified in a minority of the cases.

**Conclusions:** Patients with THA are prone to develop additional thyroid pathologies and theoretically might benefit from L-thyroxine treatment to lower the thyrotropin levels to those observed in the normal population. However, further research should be done to ascertain whether such intervention early in life would prevent development of associated thyroid conditions. At least, increased vigilance should be maintained to reveal all of the concomitant disorders as soon as possible during follow-up examinations. Application of high-throughput technologies enabling a genome-wide search for novel factors involved in thyroid embryogenesis might be the next step to expand the knowledge on THA pathogenesis. (*J Clin Endocrinol Metab* 102: 3124–3137, 2017)

**T**hyroid hemiagenesis (THA) constitutes a rare, congenital disorder that is characterized by an absence of one thyroid lobe. The presence of this anomaly is usually unsuspected and detected incidentally (*i.e.*, during screening tests or diagnostic procedures performed for other problems). Because the pathogenesis and clinical significance of this malformation remain undefined, specific clinical recommendations are lacking, especially for asymptomatic cases. The scope of this review is to summarize the genetic factors underlying its pathogenesis

and embryogenesis and explore known epidemiologic factors and associated thyroidal and nonthyroidal disorders to develop an understanding of the potential clinical importance. To achieve this goal, the PubMed database was searched (years 1970 to 2017), and the following terms were used to retrieve the results: “thyroid hemiagenesis,” “thyroid hemiopia,” “one thyroid lobe agenesis,” and “one thyroid lobe aplasia.” Subsequently, reference sections of the retrieved articles were searched.

## Thyroid Formation and Lobulation During Embryogenesis

Thyroid embryogenesis is a complex and still not fully defined process. The mechanisms governing the descent and lobulation of the thyroid primordium are yet to be elucidated. The thyroid gland is the first endocrine organ to develop during embryogenesis (1). The thyroid anlage can usually be visualized by the 20th day following conception (2). Thyroid precursor cells develop due to proliferation of endodermal epithelium, lining the floor of the primitive pharynx between the first and second pharyngeal arch (3). Experimentally, a potent trophic influence of the surrounding endoderm on the proliferation of thyrocytes has been demonstrated (4). Thus, a reduced mass of thyroid tissue could result from a lack of the stimulus from the adjacent endoderm, thereby depressing the process of proliferation of the thyroid primordium. The thyroid anlage subsequently migrates to its destination in the lower neck, gradually acquiring its classic bilobed configuration (5, 6). The lobes grow laterally, whereas the development of the median portion is restricted. During this developmental descent, the thyroid primordium stays connected to the base of the tongue by the thyroglossal duct, which apparently disappears by the end of the fifth week of pregnancy (7). By that time, the thyroid already possesses its bilobed shape with a distinct isthmus (6). Both lobes continue to expand laterally from the time of arrival of the primordium to its final locus until approximately the 50th day of pregnancy (5, 6, 8).

Whereas thyroid follicular cells of endodermal derivation dominate in the mature thyroid, parafollicular cells of neuroectodermal origin can be identified and are typically found in greatest abundance in the lower portion of the upper third of the lobes (9). Their precursors migrate from the neural crest bilaterally toward the fourth and fifth pharyngeal pouches and are deposited in the ultimobranchial bodies. The latter migrate medially and fuse with the descending thyroid primordium at about the 44th day of development. The parafollicular cells become deposited among the follicular cells, and the final histological structure of the gland is formed (10).

## The Role of Vascular Factors in Thyroid Development

Development of the thyroid gland is strongly dependent on the precursory formation and continuing development of the cardiovascular system, which is realized by the proximate positioning of cardiac mesoderm to the thyroid bud (11). Experimental studies have demonstrated that as the thyroid anlage expands, cells are gradually recruited from the surrounding endoderm. In fact, the

path of the thyroid primordium during embryogenesis is similar to that of the descent of the aortic sac. It has been proposed that the migration and final localization of the thyroid primordium is governed by its relation to developing arteries (4, 11). The fact that thyroid anlage stays connected to the aortic sac vessels may explain instances of ectopic thyroid tissue found in the pericardium (11, 12). The process of thyroid bilobation takes place in parallel with the development of the blood vessels of the third pharyngeal arch. These vessels are destined to form the internal carotid artery and a portion of the common carotid artery, with their final adult localization closely related to each mature thyroid lobe (11).

The process of thyroid anlage descent is thought to be rather passive, with the position of the thyroid primordium determined based on changes taking place in the local environment (12–14). The thyroid lobes migrate initially in the caudal direction and then move laterally (12). The weight of experimental data makes it highly probable that close contact with vessels or factors responsible for proper formation of vessels determine normal thyroid lobe formation. Conceivably then, maldevelopment or maldescent of vessels may be associated with, or be the cause of, anomalous thyroid development (11). Indeed, an association of heart and vessel defects to thyroid dysgenesis has been described (15, 16). One recent report (17) demonstrated agenesis of the thyroid artery on the agenetic side in patients with THA by computed tomography angiography of the neck, whereas the corresponding vessel on the side of the normal lobe was visualized. Therefore, one can speculate that at least one cause for the lack of thyroid lobe formation results from inadequate blood supply leading to aplasia of the lobe at a very early stage of embryogenesis (17).

Despite numerous reports supporting the fact that embryology of the thyroid appears to be connected to that of the heart, there is no evidence that this could be the reason why THA is most often left-sided. However, observations on a large cohort of subjects with THA led to the conclusion that most often, THA presents with isolated agenesis of the left lobe (the right lobe and isthmus are present), whereas the agenesis of the right lobe is often associated with simultaneous isthmus absence (18). That might suggest that the process of thyroid descent takes place not symmetrically in the midline, but occurs more to the left side. This is in accord with reports that the pyramidal lobe arises from the left side of the isthmus more often than from the midportion or the right side (19).

## Establishing the Diagnosis

THA tends to be discovered incidentally during imaging of the neck region. The condition may be suspected if no

apparent thyroid tissue is detected on palpation on one side of the neck (Fig. 1). The diagnosis can be confirmed if any contralateral thyroid tissue is revealed by imaging techniques, mostly by the means of ultrasonography (Fig. 2) or thyroid scintiscan (Fig. 3). Less frequently, the anomaly may be incidentally detected on computed tomography or magnetic resonance imaging performed in the evaluation of other medical conditions (20). A combination of ultrasound examination and isotope scintigraphy is sufficient to establish and confirm the diagnosis of THA and most other thyroid developmental anomalies (21). Sonography can visualize lobe absence and the presence or absence of an isthmus and often demonstrate underlying pathology of the gland. The appearance of THA with an associated isthmus has been described as having the appearance of a hockey stick (“hockey stick” abnormality) (8). Unilateral uptake of isotope on a scintiscan can be misleading, whereas anatomic imaging (*e.g.*, ultrasonography) will distinguish between true THA and other conditions that may present unilateral radionuclide uptake, such as unilateral thyroiditis or infiltrative disease (for example, amyloidosis) or the presence of a nonfunctional hypoplastic lobe (20, 22). The utility and popularity of thyroid ultrasonography has grown to almost gold-standard status due to its wide availability, noninvasiveness, and low cost (23, 24). Scintigraphy, in contrast, can identify possible ectopic thyroid tissue not seen by ultrasound by demonstrating functional tissue with parenchymal radionuclide uptake.

## Epidemiology

The prevalence of THA is reported to vary from 0.05% to 0.5%, although the true frequency is uncertain (25–28). This uncertainty is likely due to widespread unawareness of its existence in affected asymptomatic, euthyroid individuals. In 2009, Duarte *et al.* (29) analyzed the thyroid volume, ultrasonographic abnormalities, and urinary iodine excretion in 964 schoolchildren living in an iodine-sufficient area in southern Brazil. Approximately 0.5% of children were affected by THA (29). Earlier autopsy

studies have provided frequency estimates of THA, such as the report by Marshall in 1895 (30) that described only 1 patient with this malformation among 600 children. Because the remaining lobe is usually capable of sufficient hormonal synthesis and secretion to sustain clinical euthyroidism, the disorder rarely presents with hypothyroidism unless there is underlying Hashimoto thyroiditis. Rather, the abnormality is much more likely to be discovered incidentally during investigation of concomitant thyroid pathologies or during the course of imaging examinations. Nonetheless, juvenile subjects with overt hypothyroidism presumed to be due to the lack of one thyroid lobe have been reported (31). Calaciura *et al.* (32) stated that THA was responsible for 10.7% of congenital hyperthyrotropinemia identified during neonatal screening cases in 56 newborns. Other workers have reported a prevalence of THA varying from 0.02% to 5.7% in children with congenital hypothyroidism (33–35).

In the first systematic analysis of a large cohort of subjects with THA, our group observed a higher risk of THA development in female subjects, noting a 7:1 female to male ratio (18), confirming the conclusions drawn from previous studies (27, 28, 36). Perhaps the reported greater susceptibility of girls and women for THA may relate to both the generally higher frequency of thyroid diseases in females and the relatively greater number of female subjects presenting for evaluation to hospitals and other thyroid centers. Maiorana *et al.* (25) came to the opposite conclusion after an analysis of a systematic screening of healthy schoolchildren for thyroid developmental abnormalities that indicated a higher prevalence of THA in males, with a male to female ratio at the level of 1.4:1.0.

Remarkably, and for unknown reasons, left-sided agenesis is the considerably more frequent presentation, being present in up to ~87.5% of the subjects studied (18). Other workers found the left lobe to be absent in 80% of the cases, with a left to right hemiagenesis ratio of 4:1 (8). The most typical patterns of THA are either an isolated left lobe agenesis or combined THA of the right lobe with concomitant isthmus absence (18).

## Hormonal Status and Concomitant Thyroid Disorders

As indicated, these patients are most frequently clinically euthyroid and consequently will have normal circulating levels of thyroxine (T4) and triiodothyronine (T3). However, when compared with controls with an anatomically normal bilobate gland, the average serum thyroid-stimulating hormone (TSH) and free T3 (fT3) values were significantly higher in both children and adults (18, 25).

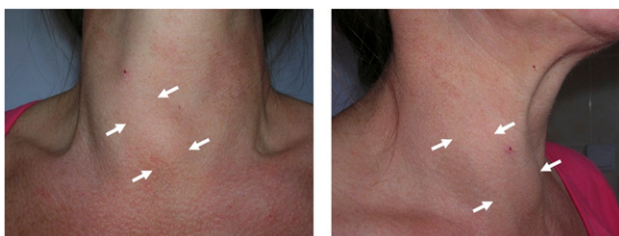

**Figure 1.** Compensatory enlargement of the right lobe in a patient with late-diagnosed left-sided THA.

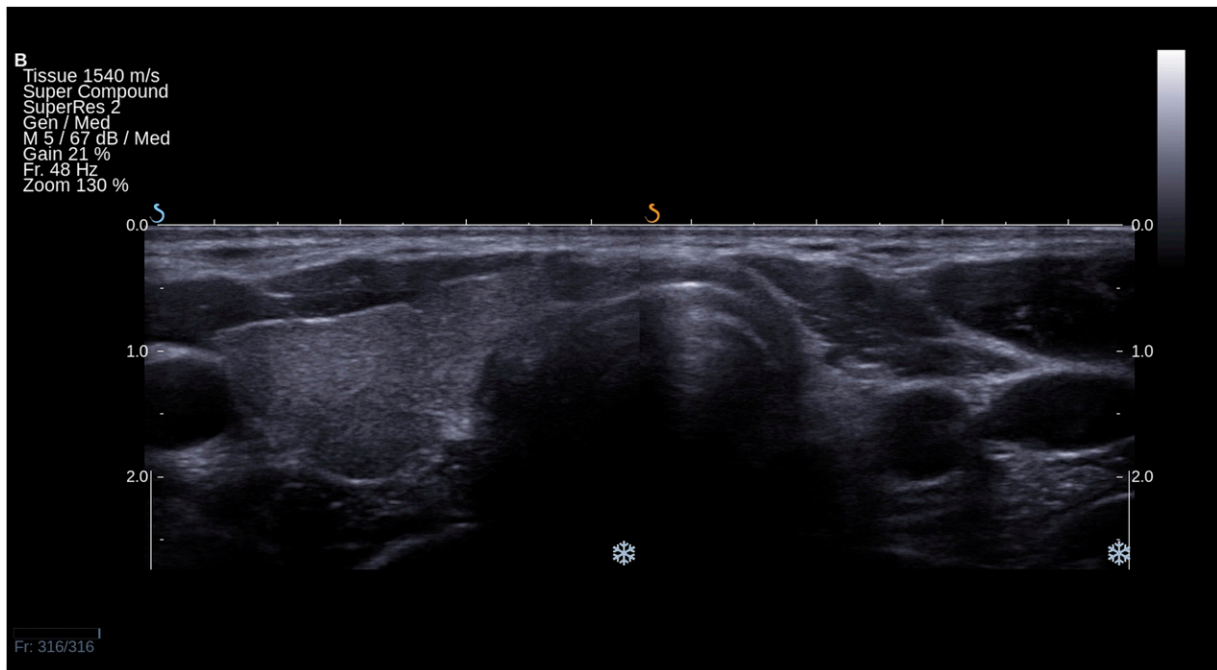

**Figure 2.** Ultrasound picture of left-sided THA in a transverse section of the neck. Right lobe and isthmus are present.

Twelve cases of THA were detected in the study by Maiorana *et al.* (25) of 24,032 unselected 11- to 14-year-old children who were examined. The study took place in southeastern Sicily, in the area where moderate iodine deficiency may be present; thus, the authors analyzed whether this abnormality was more frequent in endemic, iodine-deficient areas. However, no statistically notable difference was found. The mean TSH level value was  $2.8 \pm 0.6$  mIU/L, significantly higher than in the control group ( $1.9 \pm 0.5$  mIU/L). Moreover, average fT3 serum value was significantly higher ( $5.5 \pm 0.8$  vs  $4.5 \pm 1.1$  pmol/L). In most cases, a compensatory hypertrophy of the right lobe was described relative to half of the normal total thyroid volume. The results of a study of 40 adult patients living in Poland, currently regarded as an iodine-sufficient region (18), are of interest in this regard. The mean age of enrolled subjects was  $37.4 \pm 17.1$  years. The average TSH and fT3 serum concentrations were significantly higher in the study group than in the bilobed

controls ( $2.37 \pm 1.4$  mIU/L vs  $1.23 \pm 0.7$  mIU/L and  $6.26 \pm 0.8$  pmol/L vs.  $4.88 \pm 2.1$  pmol/L, respectively). The observed noteworthy increase in fT3 level accompanied by a higher TSH level, without changes in free T4 level (resulting in higher fT3/free T4 ratio), could result from either increased thyroidal release of T3 due to the higher TSH levels or to augmented peripheral monoiodination of T4. Because hormonal balance appears maintained in most patients, THA has been considered as a benign condition requiring no treatment. That belief and practice was based mostly on studies conducted in the pediatric population. However, studies in adult patients describe initial increments in TSH triggering an age-dependent increase in thyroid volume that is subsequently followed by gradual declines in serum TSH. Such a sequence of events is a proposed hypothesis based on cross-sectional data from large cohort studies on patients with THA. Given this scenario, one would expect a compensatory hypertrophy of the single lobe in a majority of

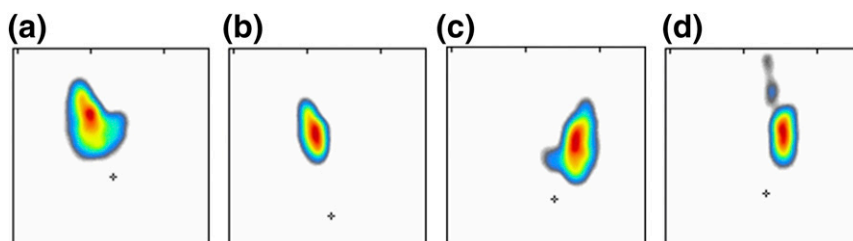

**Figure 3.** Different variants of THA visible on  $^{131}\text{I}$  scintiscan. From the left: (a) the most typical isolated left lobe agnesis (“hockey stick” sign), (b) agnesis of the left lobe and isthmus, (c) isolated agnesis of the right lobe, and (d) right lobe and isthmus agnesis. Left lobe and long pyramidal lobe are visible.

cases as a direct result of chronic thyroidal overstimulation by an increased TSH serum level. Consistent with this hypothesis is one large case-control study that observed a significantly higher incidence of concomitant thyroid disorders in patients with THA than in a control group, the most frequent associated pathologies being thyroid nodules and autoimmune thyroid disease (18). Subjects with THA and underlying thyroid autoimmunity

may present with either thyroid functional state. In general, hypothyroidism has been reported significantly more often among patients with THA in comparison with control subjects with normal thyroid function, whereas hyperthyroidism has occurred with a comparable frequency in both groups. Simple goiter and nonautoimmune subclinical hypothyroidism have also been observed, and of 40 subjects analyzed, 26 (~65%) were euthyroid (18).

Based on a study of 65 patients with THA, it was concluded that subjects with THA constitute a unique *in vivo* model of long-term elevation of serum TSH with the chronic overstimulation resulting in thyroid tissue hyperplasia and goiter. It has also been suggested that constant TSH stimulation may be the trigger for development of autoimmune thyroid disease in the group described (37). Similarly, in a recent literature summary on THA, the most frequent disorders accompanying THA were hypothyroidism, hyperthyroidism, and goiter (38). The TSH response to thyrotropin-releasing hormone administration was seen to be exaggerated in patients with THA, suggesting underlying subclinical hypothyroidism (39). However, other studies suggest that the higher prevalence of thyroid disorders in subjects with THA is overestimated. Gursoy *et al.* (28) have suggested that this may be related to a selection bias, because all subjects included would have been referred to thyroid clinics for some reason. Although patients with THA may be more prone to developing thyroid diseases than the population at large, coexisting thyroid pathology is not necessarily an obligate finding (25, 28). Selection bias aside, we remain impressed by the volume of published case reports describing coexistence of THA with other thyroid disorders (Table 1) (18, 24, 28, 33, 36, 37, 40–90).

Thus, once a diagnosis of THA is made, the next step is to assess the thyroid functional state as well as ruling out associated neoplasia. In the case of underlying autoimmune

thyroid disease, measurement of antithyroid autoantibodies (antithyroperoxidase and antithyroglobulin) are indicated in hypothyroid or goitrous subjects, and elevated titers will be found frequently. In the setting of either thyroidal hyperfunction (based upon elevated T4 and T3 and suppressed TSH) or clinical stigmata of Graves disease, measurement of anti-TSH receptor antibodies should be considered. In either case, there is a need for careful follow-up of patients affected by THA, because of higher risk of development of thyroid dysfunction due to limited functional reserve of the unilobate thyroid and/or presumably increased incidence of antithyroid autoantibodies.

### Coexisting Extrathyroidal Pathologies

As is apparent from Table 1, disorders associated with THA largely have been related to the thyroid gland, but some cases of superimposed parathyroid abnormalities have also been reported. These are mostly coexisting parathyroid adenomas on the ipsilateral side of THA and have been single or even double. Primary hyperparathyroidism due to parathyroid hyperplasia has also been described (Table 2) (89, 91–108). One unusual presentation involved both adenoma and hyperplasia of the parathyroid glands accompanied by Hashimoto thyroiditis. The patient was a 66-year-old female who presented with elevated serum levels of parathormone as well as antithyroglobulin antibodies and antithyroperoxidase antibodies. Scintigraphy with technetium 99mTc-methoxyisobutyl isonitrile confirmed the diagnosis of right THA, and a left lower hyperplastic parathyroid and a right upper parathyroid adenoma were subsequently identified when she underwent thyroidectomy for a tumor observed on ultrasound examination (97).

Apart from these unusual cases with concomitant parathyroid disease, the calcium-phosphate balance in

**Table 1. Thyroid Disorders Associated With THA**

| Type of Associated Thyroidal Disorders     | Associated Disorder                                         | Total Number of Patients Reported |
|--------------------------------------------|-------------------------------------------------------------|-----------------------------------|
| Autoimmune thyroid diseases or thyroiditis | Graves disease (18, 28, 40–58)                              | 38                                |
|                                            | Hashimoto thyroiditis (18, 24, 43, 49, 55, 59–62)           | 30                                |
|                                            | Postpartum silent thyroiditis/subacute thyroiditis (63, 64) | 2                                 |
| Goiter                                     | Toxic nodular goiter (18, 28, 50, 65)                       | 5                                 |
|                                            | Simple goiter (40, 66)                                      | 3                                 |
|                                            | Multinodular nontoxic goiter (18, 28, 37, 49, 67–74)        | 111                               |
| Differentiated thyroid cancer              | Papillary thyroid carcinoma (36, 41, 75–80)                 | 11                                |
|                                            | Follicular carcinoma (40)                                   | 1                                 |
|                                            | Mixed papillary and follicular carcinoma (81)               | 1                                 |
| Other thyroid cancers                      | Medullary thyroid carcinoma (80)                            | 1                                 |
| Developmental and congenital disorders     | Thyroglossal duct cyst (82, 83)                             | 2                                 |
|                                            | Ectopic thyroid (84–88)                                     | 5                                 |
|                                            | Congenital hypothyroidism (33, 89, 90)                      | 11                                |

**Table 2. Extrathyroidal Disorders Reported To Be Associated With THA**

| Type of Extrathyroidal Disorders | Associated Disorder                                                       | Total Number of Patients Reported |
|----------------------------------|---------------------------------------------------------------------------|-----------------------------------|
| Parathyroid disorders            | Ipsilateral parathyroid adenoma (91–94)                                   | 4                                 |
|                                  | Contralateral parathyroid adenoma (95, 96)                                | 2                                 |
|                                  | Primary parathyroid hyperplasia (97, 98)                                  | 3                                 |
| Congenital disorders             | Right aortic arch (99)                                                    | 1                                 |
|                                  | Down syndrome (89)                                                        | 1                                 |
|                                  | Marfan syndrome (100)                                                     | 1                                 |
|                                  | Williams syndrome (101)                                                   | 1                                 |
|                                  | Dysmorphic face with short stature (102)                                  | 1                                 |
|                                  | Fourth branchial cleft cyst (103)                                         | 1                                 |
|                                  | Brain cavernoma and pituitary Rathke cleft cyst (104)                     | 1                                 |
|                                  | Familial dilated cardiomyopathy and hypergonadotrophic hypogonadism (105) | 1                                 |
|                                  | Other                                                                     | Neonatal lingual choristoma (106) |
|                                  | Pituitary adenoma (107)                                                   | 1                                 |
|                                  | Autoimmune polyglandular syndrome type III (108)                          | 1                                 |

THA subjects is not in any way disturbed. The biochemical parameters (total calcium, parathormone, and calcitonin) do not differ significantly between patients with THA and controls with a normal thyroid. However, abundance of the thyroid C cells was observed in patients with THA in comparison with controls. Conceivably, an increased proportion of parafollicular cells might be observed in case of a reduced number of follicular cells in a patient with THA (40, 109). It remains uncertain whether thyroid lobe agenesis influences ipsilateral parathyroid development, but support for this thesis arose from descriptions of missing parathyroid glands and reduced thyroid artery development ipsilateral to THA (95, 99, 110). On the contrary, the normal presence of two parathyroid glands ipsilateral to THA has been reported (97, 111). Based on an analysis of nine previously reported cases of THA accompanied by hyperparathyroidism, and because the embryologic pathways of the thyroid and parathyroid glands differ, it is suggested that parathyroid exploration should follow standard surgical recommendations for primary hyperparathyroidism (96).

### Familial Clustering of THA and Other Thyroid Developmental Anomalies

Although the majority of reported cases of THA have been sporadic, familial clustering of the anomaly has also been reported. Six of 40 (15%) patients with THA described by Szczepanek *et al.* (112) belonged to three families; THA of the same side was detected in a mother and daughter, brother and sister, as well as in two sisters out of five siblings. Rajmil *et al.* (39) diagnosed THA in two sisters, whereas Kizys *et al.* (113) described the anomaly in a father and his son. These familial cases have been taken to suggest at least a partial genetic basis for

THA. Moreover, Castanet *et al.* (67) observed that THA might be associated with an increased incidence of other thyroid developmental abnormalities. In 9 out of 22 (41%) patients with THA, their first-degree relatives presented different forms of thyroid dysgenesis, including: thyroid ectopy (four times), thyroid agenesis (once), THA (two times), and thyroglossal duct cyst in two subjects (67). The exact prevalence of thyroid developmental anomalies in relatives of subjects with THA is likely to be underestimated due to the asymptomatic nature of these abnormalities and would not be diagnosed unless ultrasound screening was performed. Other observations of interest include the report of three cases of THA in a group of 241 first-degree relatives of 84 patients diagnosed with congenital hypothyroidism due to thyroid dysgenesis (114) and a report of five siblings, of whom two had thyroid ectopy, and one had THA (115). Although the coincidence of THA and other thyroid dysgenesis in families suggests a genetic background of the anomaly, we cannot rule out a role of other unknown factors, which may modulate expression of the final phenotype. One of the proposed mechanisms of this discordance is postzygotic mosaicism (116). Alternatively, THA might be one of the manifestations of a broader spectrum of thyroid developmental anomalies, which share common background. Based on reports like that of monozygotic twins, one of whom had thyroid ectopy and the other had THA (117), one could infer that not only genes but also some epigenetic factors or stochastic events during embryogenesis might contribute to the final phenotype of a hemigenetic thyroid.

### Genetic Factors Potentially Involved in Pathogenesis of THA

Common genetic factors are suggested by the occurrence in children with thyroid dysgenesis of an increased risk

for cardiac anomalies. A similar rationale holds for the reported coincidence of THA with several genetic conditions, including familial dilated cardiomyopathy and hypergonadotropic hypogonadism, Williams syndrome, and short stature with facial dysmorphism as well as Down syndrome, all of which tend to support the concept of genetic factors contributing to the development of THA (89, 101, 102, 105). Table 3 summarizes the putative genetic alterations thus far analyzed concerning the development of THA in the studies on human and mice (3, 4, 41, 67, 112, 113, 118–124).

### Thyroid transcription factors

The first genes suspected to be related to the development of THA were thyroid transcription factors, including *TTF1* (*NKX2-1*), *TTF2* (*FOXE1*), and *PAX8*. They are expressed in different tissues, but coexpression relates exclusively to thyroid cells. These genes were found to be expressed in the precursors of follicular thyroid cells, and they play a crucial role in the process of cell differentiation (125). Mutations of these genes were found to cause syndromic cases of thyroid dysgenesis, mainly agenesis or ectopy. Mutations in *PAX8* and *NKX2-5* account for only a minority of patients with severe thyroid developmental abnormalities such as thyroid agenesis, ectopy, or severe hypoplasia (126). Homozygotic deletion of either of these genes in mice leads to thyroid dysgenesis (agenesis, ectopy, or severe hypoplasia). Amendola *et al.* (118) demonstrated that simultaneous heterozygous deletion of *TTF1* and *PAX8* also leads to thyroid developmental anomalies. What is interesting is, in the abovementioned study, a particularly high incidence of THA was observed that might suggest a multigenic etiology of the anomaly. Castanet *et al.* (67) searched for mutations in *PAX8* gene and found no potential causative abnormalities in 22 patients with THA. Similar negative results were reported in a study of another group of six patients with THA (119). In contrast, Macchia *et al.* reported one familial form of THA caused by a heterozygous mutation in *PAX8* gene (120). Also, the more frequent occurrence of longer variants (at least 16 codons) of polyalanine tract in *FOXE1* gene in patients with the familial form of THA has been pointed out by Szczepanek *et al.* (112). The tract was longer at a significantly greater frequency in patients with the familial form of THA than in sporadic THA or healthy controls (112). In a recent study by Budny *et al.* (121), genetic screening of thyroid transcription factors, including *PAX8*, *TTF1*, *TTF2*, and *HHEX*, revealed no potential causative mutations in a cohort of 36 patients with THA. Additionally, multiplex ligation-dependent probe amplification analysis for structural and copy-number variations in

*PAX8*, *NKX2-1*, and *FOXE1* genes failed to reveal any abnormalities (121).

### 22q11.21 region including *SHH* and *TBX1* genes

THA has been reported occasionally in patients with DiGeorge or Williams syndrome (101). Of relevance to both of these syndromes is that the affected regions contain genes *SHH* and *TBX1*, knockouts of which in experimental studies were shown to cause a THA-alike phenotype in affected mice (4, 122, 127, 128). Animals with the *Tbx1* knockout are characterized by abnormal development of follicular cells lacking parafollicular cells, probably due to impaired development of the ultimobranchial bodies (4). However, the presence of parafollicular cells was demonstrated, and the expression of calcitonin and other genes specific for C cells was documented by Ruchala *et al.* (109) in surgical thyroidectomy specimens. *SHH* is one of the genes governing symmetric formation of organs. *SHH* mutations in humans were associated with severe syndromic cases including holoprosencephaly, and no milder forms are known (129). In contrast, Kim *et al.* (123) reported a case of THA in a patient with microduplication of the region 22q11.2. In contrast, microdeletion of this region was found in 14 out of 30 (47%) of patients diagnosed with thyroid hypoplasia described by Stagi *et al.* (130); 10 of them presented additionally with congenital heart anomaly.

One of the mechanisms suggested to be potentially involved in the development of a unilobate thyroid might be a deleted *TBX1* gene, localized in a 22q11.21 position. Fagman *et al.* (4) demonstrated that mice with a homozygotic deletion of this gene or *Shh* present with disturbed formation of a bilobed structure of the thyroid gland. The mice were proposed to be an animal model of THA, although the expression of neither of these genes at any stage of thyroid development was documented (4).

### Proteasome genes

The role of this group of genes is degradation of ubiquitinated proteins. Impairment of this process may lead to accumulation of undegraded proteins, leading to toxicity to the cell. Mutations in proteasome genes can be linked to several conditions, including developmental abnormalities as well as neurologic and autoimmune diseases. It is conceivable that even subtle alterations in protein degradation may influence the action of thyroid-specific genes and thereby affect the process of thyroid primordium migration and lobulation. Budny *et al.* (121) recently applied advanced genomic techniques, including high-resolution microarrays as well as whole-exome sequencing, to further explore the underlying mechanism of THA development. Four genetic defects (one duplication

**Table 3. Genes Analyzed and Mutations Found Thus Far in Subjects Presenting With the Phenotype of THA**

| Author                         | No. of Subjects Studied          | Material                        | Gene                                                  | Potential Role in Thyroid Development                                                                                                                                                              | Mutation Found                                                                                                                                                                                                           |
|--------------------------------|----------------------------------|---------------------------------|-------------------------------------------------------|----------------------------------------------------------------------------------------------------------------------------------------------------------------------------------------------------|--------------------------------------------------------------------------------------------------------------------------------------------------------------------------------------------------------------------------|
| Amendola <i>et al.</i> (118)   | —                                | Knockout mice model             | <i>TTF1</i> and <i>PAX8</i>                           | Transcription factors coexpressed in the precursors of thyroid follicular cells. Crucial role in the process of differentiation into thyroid cells as well as maintaining proper thyroid function. | Simultaneous heterozygous deletion of <i>TTF1</i> and <i>PAX8</i>                                                                                                                                                        |
| Castanet <i>et al.</i> (67)    | 22 patients                      | Human DNA from peripheral blood | <i>PAX8</i>                                           | Transcription factors coexpressed in the precursors of thyroid follicular cells. Crucial role in the process of differentiation into thyroid cells as well as maintaining proper thyroid function. | No mutations                                                                                                                                                                                                             |
| Tonacchera <i>et al.</i> (119) | 6 patients                       | Human DNA from peripheral blood | <i>PAX8</i>                                           | Transcription factors coexpressed in the precursors of thyroid follicular cells. Crucial role in the process of differentiation into thyroid cells as well as maintaining proper thyroid function. | No mutations                                                                                                                                                                                                             |
| Macchia <i>et al.</i> (120)    | 1 patient                        | Human DNA from peripheral blood | <i>PAX8</i>                                           | Transcription factors coexpressed in the precursors of thyroid follicular cells. Crucial role in the process of differentiation into thyroid cells as well as maintaining proper thyroid function. | Heterozygous mutation                                                                                                                                                                                                    |
| Szczepanek <i>et al.</i> (112) | 36 sporadic and 4 familial cases | Human DNA from peripheral blood | <i>FOXE1 (TTF2)</i>                                   | Transcription factors coexpressed in the precursors of thyroid follicular cells. Crucial role in the process of differentiation into thyroid cells as well as maintaining proper thyroid function. | Longer variants ( $\geq 16$ codons) of <i>FOXE1</i> -polyAla were significantly higher in patients with the familial form of THA in comparison with those with sporadic THA ( $P = 0.003$ ) and controls ( $P = 0.005$ ) |
| Budny <i>et al.</i> (121)      | 34 sporadic and 2 familial cases | Human DNA from peripheral blood | <i>PAX8, TTF1, TTF2</i>                               | Encodes transcription factor expressed in the thyroid. Necessary to maintain TTF-1, PAX8, and TTF-2 expression in the developing thyroid.                                                          | No mutations                                                                                                                                                                                                             |
|                                |                                  |                                 | <i>PAX8, NKX2-1 (TTF1), FOXE (TTF2), HHEX</i>         |                                                                                                                                                                                                    | No structural and copy number variations in MLPA analysis                                                                                                                                                                |
|                                |                                  |                                 | <i>PSMA1, PSMA3, PSMD3</i>                            |                                                                                                                                                                                                    | Duplication (one sporadic patient) and deletion (three sporadic patients)                                                                                                                                                |
|                                |                                  |                                 | <i>PSMD2</i>                                          |                                                                                                                                                                                                    | Splice site mutation (c.612T>C cDNA.1170T>C, g.3271T>C) in mother and daughter with THA                                                                                                                                  |
|                                |                                  |                                 | <i>VPS13C</i>                                         |                                                                                                                                                                                                    | Deletion (2 sporadic patients)                                                                                                                                                                                           |
| Fagman <i>et al.</i> (4, 122)  | —                                | Knockout mice model             | <i>Tbx1</i> or <i>Shh</i>                             | Genes not expressed in the thyroid bud. Involved in governing symmetric formation of organs                                                                                                        | Mice with knockout of <i>Tbx1</i> or <i>Shh</i> present abnormal development of follicular cells. Their thyroid lacks parafollicular cells probably due to impaired development of the ultimobranchial bodies            |
|                                |                                  |                                 | <i>RAD23B</i>                                         |                                                                                                                                                                                                    |                                                                                                                                                                                                                          |
| Kim <i>et al.</i> (123)        | 1 patient                        | Human DNA from peripheral blood | Chromosome region 22q11.2 (contains <i>TBX1</i> gene) | The same region is deleted in DiGeorge syndrome (associated with multiple organ malformations including parathyroids and thyroid gland; may present with thyroid hypoplasia or hemiagenesis)       | Microduplication                                                                                                                                                                                                         |

(Continued)



**Table 3. Continued**

| Author                                  | No. of Subjects Studied       | Material                                                                                                                         | Gene                              | Potential Role in Thyroid Development                                                                                                                                                                                                                                                                                         | Mutation Found                                                                                                                                                                                      |
|-----------------------------------------|-------------------------------|----------------------------------------------------------------------------------------------------------------------------------|-----------------------------------|-------------------------------------------------------------------------------------------------------------------------------------------------------------------------------------------------------------------------------------------------------------------------------------------------------------------------------|-----------------------------------------------------------------------------------------------------------------------------------------------------------------------------------------------------|
| Kizys <i>et al.</i> (113)               | 4 (2 familial and 2 sporadic) |                                                                                                                                  | <i>HOXA3, HOXB3, HOXD3</i>        | Encode a class of transcription factors that regulate the regionalization of the embryo along its major axes during development and morphogenesis of several structures. Expressed in the foregut in the early embryo and have been related to thyroid organogenesis.                                                         | Polymorphisms in the <i>HOXB3</i> (rs2229304), <i>HOXD3</i> (rs34729309, rs1051929, c.543-199G>T and c.543-34G>A; and a new synonymous variant, NP_008829.3:p.314;C>G) but no deleterious mutations |
|                                         |                               |                                                                                                                                  | <i>PITX2</i>                      | Plays essential role in embryogenic development and organogenesis. Involved in left-right patterning and the determination of internal organ positioning and asymmetry.                                                                                                                                                       | Polymorphism (c.45+76C>T) but no deleterious mutations                                                                                                                                              |
| Manley and Capecchi (3)                 | —                             | Knockout mice model                                                                                                              | <i>Hoxa3</i>                      | Encode a class of transcription factors that regulate the regionalization of the embryo along its major axes during development and morphogenesis of several structures. Expressed in the foregut in the early embryo and have been related to thyroid organogenesis.                                                         | Mice with knockout of <i>Hoxa3</i> present with fewer follicular cells as well as absence or hypoplasia of one thyroid lobe                                                                         |
| Szczepanek-Parulska <i>et al.</i> (124) | 1 patient                     | Somatic DNA from the thyroid tissue obtained from a patient with THA coexisting with nontoxic multinodular goiter                | <i>PAX8</i>                       | Transcription factor coexpressed in the precursors of thyroid follicular cells. Crucial role in the process of differentiation into thyroid cells as well as maintaining proper thyroid function.                                                                                                                             | A novel variant of <i>PAX8</i> mRNA was identified, which characterizes with an extension of the 5' untranslated region of the second exon by 97 nucleotides                                        |
| Campenni <i>et al.</i> (41)             | 1 patient                     | Somatic DNA from the thyroid tissue obtained from a patient with THA coexisting with Graves disease and papillary thyroid cancer | <i>PAX8</i> and <i>TSHR</i> genes | <i>PAX8</i> is a transcription factor coexpressed in the precursors of thyroid follicular cells. Crucial role in the process of differentiation into thyroid cells as well as maintaining proper thyroid function. <i>TSHR</i> is expressed in thyroid follicular cells, crucial for TSH-mediated thyroid cells proliferation | No mutations detected                                                                                                                                                                               |

Abbreviation: MLPA, multiplex ligation-dependent probe amplification.

and three deletions) affecting proteasome genes *PSMA1*, *PSMA3*, and *PSMD3* were detected in four sporadic patients with THA. In addition, in a family in which THA was found to be an inherited disorder, a splice site mutation in the *PSMD2* gene (c.612T>C cDNA.1170T>C, g.3271T>C) was found in an affected mother and daughter. The mutation introduces an exonic splicing silencer sequence. Moreover, the proteasome-related pathomechanism potentially contributing to the development of THA is further supported by occurrence of a deletion of *VPS13C*, as found in two patients with THA and *RAD23B* in another one patient with THA as both these genes are related to the ubiquitin-proteasome degradation process. These workers speculated that the

detected variations influenced the highly dynamic thyroid bilobation process. However, functional analysis is required to confirm those findings. Although recurrent, the detected mutations in proteasome-related genes account for only a small portion of the studied patients with THA, whereas the mechanism remains unknown in the majority (121).

#### Human homeobox genes

It was recently demonstrated that mice with the knockout of *Hoxa3* present with fewer follicular cells as well as absence or hypoplasia of one thyroid lobe (3). Kizys *et al.* (113) demonstrated lack of mutations in *HOXA3*, *HOXB3*, *HOXC3*, and *PITX2* genes in four

patients with THA, both sporadic and familial. However, some polymorphic variants were described.

### Somatic mutation analysis

There have been few published reports on the somatic genetic alterations found in a hemigenetic thyroid obtained during thyroidectomy. In the study by Szczepanek-Parulska *et al.* (124), surgical thyroid specimens obtained from three patients with confirmed THA who were thyroidectomized for unrelated medical reasons were subjected to genetic analysis. A novel variant of *PAX8* mRNA was identified, characterized by an extension of the 5' untranslated region of the second exon by 97 nucleotides. Genomic DNA analysis revealed that an intronic sequence is localized between exon 1 and 2, and 97 bp of its 3' site were not spliced out but incorporated into a *PAX8* transcript. Conceivably, an alternative 3' acceptor site in the second exon of *PAX8* could be designated. The authors speculate that the presence of such an insert may potentially impair binding of mRNA to the ribosome and consequently significantly decrease expression of the *PAX8* protein (124). In another study, Campenni *et al.* (41) performed an extraction of somatic DNA from the thyroid tissue obtained from a patient with THA, in whom THA coexisting with Graves disease and papillary thyroid cancer were diagnosed. However, no mutations in *PAX8* and *TSH-receptor (TSHR)* genes were detected.

### Conclusions and Perspectives

To sum up, despite all of the available data, including a host of recent publications, our understanding of THA remains incomplete. Being unable to assess its true population frequency and actual influence on health in general, we are still unaware of the correct clinical approach to affected patients. Patients with THA are prone to develop additional thyroid pathologies and theoretically might benefit from L-thyroxine treatment to lower the thyrotropin levels to that observed in the normal population. However, further research should be done to ascertain whether such intervention early in life would prevent development of associated thyroid conditions. At least, increased vigilance should be maintained to reveal all of the concomitant or associated disorders as soon as possible during follow-up examinations. This is particularly the case concerning the Williams and DiGeorge syndromes for which screening for thyroid gland disorders is justified.

In spite of growing and convincing evidence on the potential genetic background of THA, our knowledge of the factors responsible for the development of a hemigenetic thyroid is incomplete, and further studies are

needed. Having failed to find a common genetic background of the anomaly and discordance of homozygotic twins with thyroid dysgenesis, including THA, it was suggested that non-Mendelian inheritance might contribute to the development of THA. Epigenetic changes, somatic mutations, or even stochastic events occurring at the early steps of embryogenesis might apply (131). The failure to identify mutations in thyroid-specific genes has led investigators to turn to a search for mutations in extrathyroid genes potentially involved in the process of formation of thyroid primordium, such as vascular factors or adhesion molecules (132), and proteasome genes (121). Application of high-throughput technologies (*i.e.*, whole-exome sequencing) enabling a genome-wide search for novel factors involved in thyroid embryogenesis might be the next step that will allow the nature of this complex process to be revealed.

### Acknowledgments

Address all correspondence and requests for reprints to: Marek Ruchala, MD, PhD, Department of Endocrinology, Metabolism and Internal Medicine, Poznan University of Medical Sciences, Przybyszewskiego St. 49, 60-355 Poznan, Poland. E-mail: [mruchala@ump.edu.pl](mailto:mruchala@ump.edu.pl).

Disclosure Summary: The authors have nothing to disclose.

### References

1. Trueba SS, Augé J, Mattei G, Etchevers H, Martinovic J, Czernichow P, Vekemans M, Polak M, Attié-Bitach T. *PAX8*, *TITF1*, and *FOXE1* gene expression patterns during human development: new insights into human thyroid development and thyroid dysgenesis-associated malformations. *J Clin Endocrinol Metab.* 2005;90(1):455–462.
2. Park SM, Chatterjee VK. Genetics of congenital hypothyroidism. *J Med Genet.* 2005;42(5):379–389.
3. Manley NR, Capecchi MR. The role of *Hoxa-3* in mouse thymus and thyroid development. *Development.* 1995;121(7):1989–2003.
4. Fagman H, Liao J, Westerlund J, Andersson L, Morrow BE, Nilsson M. The 22q11 deletion syndrome candidate gene *Tbx1* determines thyroid size and positioning. *Hum Mol Genet.* 2007;16(3):276–285.
5. Polak M, Sura-Trueba S, Chauty A, Szinnai G, Carré A, Castanet M. Molecular mechanisms of thyroid dysgenesis. *Horm Res.* 2004;62(Suppl 3):14–21.
6. Van Vliet G. Development of the thyroid gland: lessons from congenitally hypothyroid mice and men. *Clin Genet.* 2003;63(6):445–455.
7. O'Rahilly R. The timing and sequence of events in the development of the human endocrine system during the embryonic period proper. *Anat Embryol (Berl).* 1983;166(3):439–451.
8. Melnick JC, Stemkowski PE. Thyroid hemigenesis (hockey stick sign): a review of the world literature and a report of four cases. *J Clin Endocrinol Metab.* 1981;52(2):247–251.
9. Hoyes AD, Kershaw DR. Anatomy and development of the thyroid gland. *Ear Nose Throat J.* 1985;64(7):318–333.
10. Yadav S, Singh I, Singh J, Aggarwal N. Medullary carcinoma in a lingual thyroid. *Singapore Med J.* 2008;49(3):251–253.
11. Fagman H, Andersson L, Nilsson M. The developing mouse thyroid: embryonic vessel contacts and parenchymal growth

- pattern during specification, budding, migration, and lobulation. *Dev Dyn*. 2006;235(2):444–455.
12. Alt B, Elsalini OA, Schrupf P, Haufs N, Lawson ND, Schwabe GC, Mundlos S, Grüters A, Krude H, Rohr KB. Arteries define the position of the thyroid gland during its developmental relocation. *Development*. 2006;133(19):3797–3804.
  13. Fagman H, Grände M, Edsbacke J, Semb H, Nilsson M. Expression of classical cadherins in thyroid development: maintenance of an epithelial phenotype throughout organogenesis. *Endocrinology*. 2003;144(8):3618–3624.
  14. Hilfer SR, Brown JW. The development of pharyngeal endocrine organs in mouse and chick embryos. *Scan Electron Microsc*. 1984; (Pt 4):2009–2022.
  15. Olivieri A, Stazi MA, Mastroiacovo P, Fazzini C, Medda E, Spagnolo A, De Angelis S, Grandolfo ME, Taruscio D, Cordeddu V, Sorcini M; Study Group for Congenital Hypothyroidism. A population-based study on the frequency of additional congenital malformations in infants with congenital hypothyroidism: data from the Italian Registry for Congenital Hypothyroidism (1991–1998). *J Clin Endocrinol Metab*. 2002;87(2):557–562.
  16. Passeri E, Frigerio M, De Filippis T, Valaperta R, Capelli P, Costa E, Fugazzola L, Marelli F, Porazzi P, Arcidiacono C, Carminati M, Ambrosi B, Persani L, Corbetta S. Increased risk for non-autoimmune hypothyroidism in young patients with congenital heart defects. *J Clin Endocrinol Metab*. 2011;96(7):E1115–E1119.
  17. Verma A, Bhartiya SK, Basu SP, Shukla VK, Shukla RC. Congenital thyroid hemiagenesis with thyroid nodules—Role of TI-RADS to prevent long term thyroid replacement therapy. *Int J Surg Case Rep*. 2016;27:59–62.
  18. Ruchala M, Szczepanek E, Szaflarski W, Moczko J, Czarnywojtek A, Pietz L, Nowicki M, Niedziela M, Zabel M, Köhrle J, Sowinski J. Increased risk of thyroid pathology in patients with thyroid hemiagenesis: results of a large cohort case-control study. *Eur J Endocrinol*. 2010;162(1):153–160.
  19. Braun EM, Windisch G, Wolf G, Hausleitner L, Anderhuber F. The pyramidal lobe: clinical anatomy and its importance in thyroid surgery. *Surg Radiol Anat*. 2007;29(1):21–27.
  20. Bergami G, Barbuti D, Di Mario M. [Echographic diagnosis of thyroid hemiagenesis]. *Minerva Endocrinol*. 1995;20(3):195–198.
  21. Ruchala M, Szczepanek E, Sowiński J. Diagnostic value of radionuclide scanning and ultrasonography in thyroid developmental anomaly imaging. *Nucl Med Rev Cent East Eur*. 2011;14(1):21–28.
  22. De Remigis P, D'Angelo M, Bonaduce S, Di Giandomenico V, Sensi S. Comparison of ultrasonic scanning and scintiscanning in the evaluation of thyroid hemiagenesis. *J Clin Ultrasound*. 1985; 13(8):561–563.
  23. Berker D, Ozuguz U, Isik S, Aydin Y, Ates Tutuncu Y, Akbaba G, Guler S. A report of ten patients with thyroid hemiagenesis: ultrasound screening in patients with thyroid disease. *Swiss Med Wkly*. 2010;140(7-8):118–121.
  24. Nsame D, Chadli A, Hallab L, El Aziz S, El Ghomari H, Farouqi A. Thyroid hemiagenesis associated with Hashimoto's thyroiditis. *Case Rep Endocrinol*. 2013;2013:414506.
  25. Maiorana R, Carta A, Floriddia G, Leonardi D, Buscema M, Sava L, Calaciura F, Vigneri R. Thyroid hemiagenesis: prevalence in normal children and effect on thyroid function. *J Clin Endocrinol Metab*. 2003;88(4):1534–1536.
  26. Korpai-Szczyrska M, Kosiak W, Swieton D. Prevalence of thyroid hemiagenesis in an asymptomatic schoolchildren population. *Thyroid*. 2008;18(6):637–639.
  27. Shabana W, Delange F, Freson M, Osteaux M, De Schepper J. Prevalence of thyroid hemiagenesis: ultrasound screening in normal children. *Eur J Pediatr*. 2000;159(6):456–458.
  28. Gursoy A, Anil C, Unal AD, Demirer AN, Tutuncu NB, Erdogan MF. Clinical and epidemiological characteristics of thyroid hemiagenesis: ultrasound screening in patients with thyroid disease and normal population. *Endocrine*. 2008;33(3):338–341.
  29. Duarte GC, Tomimori EK, de Camargo RY, Catarino RM, Ferreira JE, Knobel M, Medeiros-Neto G. Excessive iodine intake and ultrasonographic thyroid abnormalities in schoolchildren. *J Pediatr Endocrinol Metab*. 2009;22(4):327–334.
  30. Marshall CF. Variations in the form of the thyroid gland in man. *J Anat Physiol*. 1895;29(Pt 2):234–239.
  31. Devos H, Rodd C, Gagné N, Laframboise R, Van Vliet G. A search for the possible molecular mechanisms of thyroid dysgenesis: sex ratios and associated malformations. *J Clin Endocrinol Metab*. 1999;84(7):2502–2506.
  32. Calaciura F, Motta RM, Miscio G, Fichera G, Leonardi D, Carta A, Trischitta V, Tassi V, Sava L, Vigneri R. Subclinical hypothyroidism in early childhood: a frequent outcome of transient neonatal hyperthyrotropinemia. *J Clin Endocrinol Metab*. 2002; 87(7):3209–3214.
  33. Dias VM, Campos AP, Chagas AJ, Silva RM. Congenital hypothyroidism: etiology. *J Pediatr Endocrinol Metab*. 2010;23(8): 815–826.
  34. Hoseini M, Hekmatnia A, Hashemipour M, Basiratnia R, Omidifar N, Rezazade A, Koohi R. Sonographic assessment of congenitally hypothyroid children in Iran. *Endokrynol Pol*. 2010; 61(6):665–670.
  35. Hsu CY, Kao CH, Lin WY, Liao SQ, Wan SJ. [The application of Tc-99m thyroid scintigraphy in congenital hypothyroidism]. *Gaoxiang Yi Xue Ke Xue Za Zhi*. 1993;9(5):290–295.
  36. Shaha AR, Gujarrati R. Thyroid hemiagenesis. *J Surg Oncol*. 1997; 65(2):137–140.
  37. Szczepanek-Parulska E, Zybek-Kocik A, Wolinski K, Czarnocka B, Ruchala M. Does TSH trigger the anti-thyroid autoimmune processes? Observation on a large cohort of naive patients with thyroid hemiagenesis. *Arch Immunol Ther Exp (Warsz)*. 2016; 64(4):331–338.
  38. Wu YH, Wein RO, Carter B. Thyroid hemiagenesis: a case series and review of the literature. *Am J Otolaryngol*. 2012;33(3):299–302.
  39. Rajmil HO, Rodríguez-Espinosa J, Soldevila J, Ordóñez-Llanos J. Thyroid hemiagenesis in two sisters. *J Endocrinol Invest*. 1984; 7(4):393–394.
  40. McHenry CR, Walfish PG, Rosen IB, Lawrence AM, Paloyan E. Congenital thyroid hemiagenesis. *Am Surg*. 1995;61(7):634–638, discussion 638–639.
  41. Campenni A, Giovinazzo S, Curtò L, Giordano E, Trovato M, Ruggeri RM, Baldari S. Thyroid hemiagenesis, Graves' disease and differentiated thyroid cancer: a very rare association: case report and review of literature. *Hormones (Athens)*. 2015;14(3): 451–458.
  42. Baldini M, Orsatti A, Cantalamesa L. A singular case of Graves' disease in congenital thyroid hemiagenesis. *Horm Res*. 2005; 63(3):107–110.
  43. Bando Y, Nagai Y, Ushioji Y, Toya D, Tanaka N, Fujisawa M. Development of Graves' hyperthyroidism from primary hypothyroidism in a case of thyroid hemiagenesis. *Thyroid*. 1999;9(2): 183–187.
  44. Burman KD, Adler RA, Wartofsky L. Hemiagenesis of the thyroid gland. *Am J Med*. 1975;58(1):143–146.
  45. Cakir M, Gonen S, Dikbas O, Ozturk B. Thyroid hemiagenesis with Graves' disease, Graves' ophthalmopathy and multinodular goiter. *Intern Med*. 2009;48(12):1047–1049.
  46. Gurleyik G, Gurleyik E. Thyroid hemiagenesis associated with hyperthyroidism. *Case Rep Otolaryngol*. 2015;2015:829712.
  47. Levy EG. Graves' disease in a patient with thyroid hemiagenesis. *Thyroidology*. 1989;1(1):49–50.
  48. Mikosch P, Gallowitsch HJ, Kresnik E, Lind P. [Thyroid gland hemiagenesis with Graves' disease]. *Nuklearmedizin*. 1999;38(1): 35–37.
  49. Mikosch P, Gallowitsch HJ, Kresnik E, Molnar M, Gomez I, Lind P. Thyroid hemiagenesis in an endemic goiter area diagnosed by

- ultrasonography: report of sixteen patients. *Thyroid*. 1999;9(11):1075–1084.
50. Mortimer PS, Tomlinson IW, Rosenthal FD. Hemiaplasia of the thyroid with thyrotoxicosis. *J Clin Endocrinol Metab*. 1981;52(1):152–155.
  51. Ozaki O, Ito K, Mimura T, Sugino K, Kitamura Y, Iwabuchi H, Kawano M. Hemiaplasia of the thyroid associated with Graves' disease: report of three cases and a review of the literature. *Surg Today*. 1994;24(2):164–169.
  52. Ozgen AG, Saygili F, Kabalak T. Thyroid hemigenesis associated with Graves' disease and Graves' ophthalmopathy: case report. *Thyroid*. 2004;14(1):75–77.
  53. Philip R, Ashokan A, Philip R, Keshavan C. Graves' disease with thyroid hemigenesis: A rare abnormality with rarer presentation. *Indian J Nucl Med*. 2014;29(2):124–125.
  54. Rashid HI, Yassin J, Owen WJ. A case of Graves' disease in association with hemigenesis of the thyroid gland. *Int J Clin Pract*. 1998;52(7):515–516.
  55. Ruchala M, Szczepanek E, Skiba A, Czepczynski R, Sowinski J. Graves' hyperthyroidism following primary hypothyroidism due to Hashimoto's thyroiditis in a case of thyroid hemigenesis: case report. *Neuro Endocrinol Lett*. 2008;29(1):55–58.
  56. Sasaki H, Futata T, Ninomiya H, Higashi Y, Okumura M. CT and MR imagings of single thyroid lobe (thyroid hemigenesis) with Graves' disease. *Postgrad Med J*. 1991;67(789):701.
  57. Shechner C, Kraiem Z, Zuckerman E, Dickstein G. Toxic Graves' disease with thyroid hemigenesis: diagnosis using thyroid-stimulating immunoglobulin measurements. *Thyroid*. 1992; 2(2):133–135.
  58. Véliz J, Pineda G. [Thyroid hemigenesis associated with Basedow-Graves disease. Report of a case]. *Rev Med Chil*. 2000; 128(8):896–898.
  59. De Sanctis V, Soliman AT, Di Maio S, Elsedfy H, Soliman NA, Elalaily R. Thyroid Hemigenesis from Childhood to Adulthood: Review of Literature and Personal Experience. *Pediatr Endocrinol Rev*. 2016;13(3):612–619.
  60. Lazzarin M, Benati F, Menini C. [Agenesis of the thyroid lobe associated with Hashimoto's thyroiditis]. *Minerva Endocrinol*. 1997;22(3):75–77.
  61. Marwaha RK, Khanna CM, Gupta RK, Sharma R. Hemigenesis associated with chronic lymphocytic thyroiditis. *J Assoc Physicians India*. 1990;38(7):507–508.
  62. Sharma R, Mondal A, Popli M, Sahoo M, Malhotra N, Soni S. Hemigenesis of the thyroid associated with chronic lymphocytic thyroiditis. *Clin Nucl Med*. 2001;26(6):506–508.
  63. Nakamura S, Isaji M, Ishimori M. Thyroid hemigenesis with postpartum silent thyroiditis. *Intern Med*. 2004;43(4):306–309.
  64. Shibutani Y, Inoue D, Koshiyama H, Mori T. Thyroid hemigenesis with subacute thyroiditis. *Thyroid*. 1995;5(2):133–135.
  65. Kocakusak A, Akinci M, Arkan S, Sunar H, Yucel AF, Senturk O. Left thyroid lobe hemigenesis with hyperthyroidism: report of a case. *Surg Today*. 2004;34(5):437–439.
  66. Yildiz M, Bozkurt MK. Thyroid hemigenesis. *J Adolesc Health*. 2003;33(4):291–292.
  67. Castanet M, Leenhardt L, Léger J, Simon-Carré A, Lyonnet S, Pelet A, Czernichow P, Polak M. Thyroid hemigenesis is a rare variant of thyroid dysgenesis with a familial component but without Pax8 mutations in a cohort of 22 cases. *Pediatr Res*. 2005; 57(6):908–913.
  68. Aslaner A, Aydin M, Ozdere A. Multinodular goitre with thyroid hemigenesis: a case report and review of the literature. *Acta Chir Belg*. 2005;105(5):528–530.
  69. Bhartiya S, Verma A, Basu S, Shukla V. Congenital thyroid hemigenesis with multinodular goiter. *Acta Radiol Short Rep*. 2014;3(9):2047981614530286.
  70. Karabay N, Comlekci A, Canda MS, Bayraktar F, Degirmenci B. Thyroid hemigenesis with multinodular goiter: a case report and review of the literature. *Endocr J*. 2003;50(4):409–413.
  71. Kirdak T, Gulcu B, Korun N. Thyroid hemigenesis associated with retrosternal nodular goiter: a case report. *Acta Med Iran*. 2014;52(9):725–727.
  72. Park IH, Kwon SY, Jung KY, Woo JS. Thyroid hemigenesis: clinical significance in the patient with thyroid nodule. *J Laryngol Otol*. 2006;120(7):605–607.
  73. Piera J, Garriga J, Calabuig R, Bargallo D. Thyroidal hemigenesis. *Am J Surg*. 1986;151(3):419–421.
  74. Tiwari PK, Baxi M, Baxi J, Koirala D. Right-sided hemigenesis of the thyroid lobe and isthmus: a case report. *Indian J Radiol Imaging*. 2008;18(4):313–315.
  75. Ammatturo C, Cerrato C, Duraccio S, Santoro M, Rossi R, Fabozzi F, Podio PP. [Thyroid hemigenesis associated with Flajani's disease and papillary carcinoma. A case report]. *Chir Ital*. 2007; 59(2):263–267.
  76. Karatağ GY, Albayrak ZK, Öney HK, Karatağ O, Peker Ö. Coexistence of thyroid hemigenesis, nodular goitre and papillary carcinoma. *Kulak Burun Bogaz Ihtis Derg*. 2013;23(2):115–118.
  77. Khatri VP, Espinosa MH, Harada WA. Papillary adenocarcinoma in thyroid hemigenesis. *Head Neck*. 1992;14(4):312–315.
  78. Lee YS, Yun JS, Jeong JJ, Nam KH, Chung WY, Park CS. Thyroid hemigenesis associated with thyroid adenomatous hyperplasia and papillary thyroid carcinoma. *Thyroid*. 2008;18(3):381–382.
  79. Pizzini AM, Papi G, Corrado S, Carani C, Roti E. Thyroid hemigenesis and incidentally discovered papillary thyroid cancer: case report and review of the literature. *J Endocrinol Invest*. 2005; 28(1):66–71.
  80. Wang J, Gao L, Song C. Thyroid hemigenesis associated with medullary or papillary carcinoma: report of cases. *Head Neck*. 2014;36(11):E106–E111.
  81. Hamburger JL, Hamburger SW. Thyroidal hemigenesis. Report of a case and comments on clinical ramifications. *Arch Surg*. 1970; 100(3):319–320.
  82. Tsang SK, Maher J. Thyroid hemigenesis accompanying a thyroglossal duct cyst: a case report. *Clin Nucl Med*. 1998;23(4): 229–232.
  83. Berni Canani F, Dall'Olio D, Chiarini V, Casadei GP, Papini E. Papillary carcinoma of a thyroglossal duct cyst in a patient with thyroid hemigenesis: effectiveness of conservative surgical treatment. *Endocr Pract*. 2008;14(4):465–469.
  84. Aydogan F, Aydogan A, Akkucuk S, Ustun I, Gokce C. Thyroid hemigenesis, ectopic submandibular thyroid tissue, and apparent persistent subclinical thyrotoxicosis. *Thyroid*. 2013; 23(5):633–635.
  85. Hsu CY, Wang SJ. Thyroid hemigenesis accompanying an ectopic sublingual thyroid. *Clin Nucl Med*. 1994;19(6):546.
  86. Huang SM, Chen HD, Wen TY, Kun MS. Right thyroid hemigenesis associated with papillary thyroid cancer and an ectopic prelaryngeal thyroid: a case report. *J Formos Med Assoc*. 2002; 101(5):368–371.
  87. Velayutham K, Mahadevan S, Velayutham L, Jayapaul M, Appakalai B, Kannan A. A case of hemigenesis of thyroid with double ectopic thyroid tissue. *Indian J Endocrinol Metab*. 2013; 17(4):756–758.
  88. Yang YS, Hong KH. Case of thyroid hemigenesis and ectopic lingual thyroid presenting as goitre. *J Laryngol Otol*. 2008;122(8): e17.
  89. Nebesio TD, Eugster EA. Unusual thyroid constellation in Down syndrome: congenital hypothyroidism, Graves' disease, and hemigenesis in the same child. *J Pediatr Endocrinol Metab*. 2009; 22(3):263–268.
  90. Beltrão CB, Juliano AG, Chammass MC, Watanabe T, Sapienza MT, Marui S. Etiology of congenital hypothyroidism using thyroglobulin and ultrasound combination. *Endocr J*. 2010;57(7): 587–593.
  91. Eroglu M, Ozkul F, Barutcu EC, Arik K, Adam G, Bilen Y, Ukinç K, Asik M. Severe hyperparathyroidism in patient with right thyroid hemigenesis. *J Pak Med Assoc*. 2015;65(9):1022–1023.

92. Isreb S, Alem F, Smith D. Left thyroid hemiogenesis in a patient with primary hyperparathyroidism. *BMJ Case Rep.* 2010;2010. doi:10.1136/bcr.03.2010.2864
93. Kroeker TR, Stancoven KM, Preskitt JT. Parathyroid adenoma on the ipsilateral side of thyroid hemiogenesis. *Proc (Bayl Univ Med Cent).* 2011;24(2):92–93.
94. Mydlarz WK, Zhang K, Micchelli ST, Kim M, Tufano RP. Ipsilateral double parathyroid adenoma and thyroid hemiogenesis. *ORL J Otorhinolaryngol Relat Spec.* 2010;72(5):272–274.
95. Sakurai K, Amano S, Enomoto K, Matsuo S, Kitajima A. Primary hyperparathyroidism with thyroid hemiogenesis. *Asian J Surg.* 2007;30(2):151–153.
96. Ferrari CC, Lorenz K, Dionigi G, Dralle H. Surgical strategy for primary hyperparathyroidism with thyroid hemiogenesis. *Langenbecks Arch Surg.* 2014;399(8):1077–1081.
97. Oruci M, Ito Y, Buta M, Radisavljevic Z, Pupic G, Djuricic I, Dzodic R. Right thyroid hemiogenesis with adenoma and hyperplasia of parathyroid glands—case report. *BMC Endocr Disord.* 2012;12:29.
98. Duh QY, Ciulla TA, Clark OH. Primary parathyroid hyperplasia associated with thyroid hemiogenesis and agenesis of the isthmus. *Surgery.* 1994;115(2):257–263.
99. Konno N, Kanaya A. Thyroid hemiogenesis associated with the right aortic arch. *J Endocrinol Invest.* 1988;11(9):685–687.
100. Rodriguez Cuartero A, Hernandez Burruezo JJ. [Marfan's syndrome and thyroid hemiogenesis]. *An Med Interna.* 1993;10(3):154.
101. Cammareri V, Vignati G, Nocera G, Beck-Peccoz P, Persani L. Thyroid hemiogenesis and elevated thyrotropin levels in a child with Williams syndrome. *Am J Med Genet.* 1999;85(5):491–494.
102. Vakili R, Mazlouman SJ. Dyshormonogenic hypothyroidism with normal neurological development, unexplained short stature and facial anomalies in three siblings. *Clin Dysmorphol.* 2003;12(1):21–27.
103. Ng TT, Soon DS, Mahanta V. A tale of two anomalies: fourth branchial cleft cyst with thyroid hemiogenesis [published online ahead of print May 19, 2016]. *ANZ J Surg.* doi: 10.1111/ans.13637.
104. Ammar FA, Al-Badri MR, Zantout MS, Azar ST. Thyroid hemiogenesis coexisting with brain cavernoma and pituitary Rathke's cleft cyst. *J Postgrad Med.* 2016;62(2):135–136.
105. Gursoy A, Sahin M, Ertugrul DT, Berberoglu Z, Sezgin A, Tutuncu NB, Demirag NG. Familial dilated cardiomyopathy hypergonadotrophic hypogonadism associated with thyroid hemiogenesis. *Am J Med Genet A.* 2006;140(8):895–896.
106. Nayak DR, Bhandarkar AM, Joy J, Pai K. Neonatal lingual choristoma with thyroid hemiogenesis. *BMJ Case Rep.* 2015; 2015. doi:10.1136/bcr-2015-209744
107. Leiba S, Shani M, Zahavi I, Samuel R, Borohowsky S, Ber A. Secondary pituitary insufficiency: report of three cases of ectopia or hemiogenesis of the thyroid gland. *Arch Intern Med.* 1976; 136(9):1010–1015.
108. Papi G, Salvatori R, Ferretti G, Roti E. Thyroid hemiogenesis and autoimmune polyglandular syndrome type III. *J Endocrinol Invest.* 2003;26(11):1160–1161.
109. Ruchala M, Szczepanek E, Sujka-Kordowska P, Zabel M, Biczysko M, Sowinski J. The immunohistochemical demonstration of parafollicular cells and evaluation of calcium-phosphate balance in patients with thyroid hemiogenesis. *Folia Histochem Cytobiol.* 2011;49(2):299–305.
110. Mariani G, Molea N, Toni MG, Bianchi R. Thyroid hemiogenesis: a review of thirteen consecutive cases. *J Nucl Med Allied Sci.* 1980;24(3-4):183–187.
111. Woods RH, Loury M. Thyroid hemiogenesis in a patient with a parathyroid adenoma. *Otolaryngol Head Neck Surg.* 1992; 107(3):469–471.
112. Szczepanek E, Ruchala M, Szaflarski W, Budny B, Kilinska L, Jaroniec M, Niedziela M, Zabel M, Sowinski J. FOXE1 polyalanine tract length polymorphism in patients with thyroid hemiogenesis and subjects with normal thyroid. *Horm Res Paediatr.* 2011;75(5):329–334.
113. Kizys MM, Nesi-França S, Cardoso MG, Harada MY, Melo MC, Chiamolera MI, Dias-da-Silva MR, Maciel RM. The absence of mutations in homeobox candidate genes HOXA3, HOXB3, HOXD3 and PITX2 in familial and sporadic thyroid hemiogenesis. *J Pediatr Endocrinol Metab.* 2014;27(3-4):317–322.
114. Léger J, Marinovic D, Garel C, Bonaiti-Pellié C, Polak M, Czernichow P. Thyroid developmental anomalies in first degree relatives of children with congenital hypothyroidism. *J Clin Endocrinol Metab.* 2002;87(2):575–580.
115. Rosenberg T, Gilboa Y. Familial thyroid ectopy and hemiogenesis. *Arch Dis Child.* 1980;55(8):639–641.
116. Breckpot J, Thienpont B, Gewillig M, Allegaert K, Vermeesch JR, Devriendt K. Differences in copy number variation between discordant monozygotic twins as a model for exploring chromosomal mosaicism in congenital heart defects. *Mol Syndromol.* 2012;2(2):81–87.
117. McLean R, Howard N, Murray IP. Thyroid dysgenesis in monozygotic twins: variants identified by scintigraphy. *Eur J Nucl Med.* 1985;10(7-8):346–348.
118. Amendola E, De Luca P, Macchia PE, Terracciano D, Rosica A, Chiappetta G, Kimura S, Mansouri A, Affuso A, Arra C, Macchia V, Di Lauro R, De Felice M. A mouse model demonstrates a multigenic origin of congenital hypothyroidism. *Endocrinology.* 2005;146(12):5038–5047.
119. Tonacchera M, Banco ME, Montanelli L, Di Cosmo C, Agretti P, De Marco G, Ferrarini E, Ordookhani A, Perri A, Chiovato L, Santini F, Vitti P, Pinchera A. Genetic analysis of the PAX8 gene in children with congenital hypothyroidism and dysgenetic or ectopic thyroid glands: identification of a novel sequence variant. *Clin Endocrinol (Oxf).* 2007;67(1):34–40.
120. Macchia PE, Lapi P, Krude H, Pirro MT, Missero C, Chiovato L, Souabni A, Baserga M, Tassi V, Pinchera A, Fenzi G, Grüters A, Busslinger M, Di Lauro R. PAX8 mutations associated with congenital hypothyroidism caused by thyroid dysgenesis. *Nat Genet.* 1998;19(1):83–86.
121. Budny B, Szczepanek-Parulska E, Zemojtel T, Szaflarski W, Rydzanicz M, Wesoły J, Handschuh L, Wolinski K, Piatek K, Niedziela M, Ziemnicka K, Figlerowicz M, Zabel M, Ruchala M. Mutations in proteasome-related genes are associated with thyroid hemiogenesis. *Endocrine.* 2017;56(2):279–285.
122. Fagman H, Grande M, Gritli-Linde A, Nilsson M. Genetic deletion of sonic hedgehog causes hemiogenesis and ectopic development of the thyroid in mouse. *Am J Pathol.* 2004;164(5):1865–1872.
123. Kim HJ, Jo HS, Yoo EG, Chung IH, Kim SW, Lee KH, Chang YH. 22q11.2 Microduplication with thyroid hemiogenesis. *Horm Res Paediatr.* 2013;79(4):243–249.
124. Szczepanek-Parulska E, Szaflarski W, Piatek K, Budny B, Jaszczynska-Nowinka K, Biczysko M, Wierzbicki T, Skrobisz J, Zabel M, Ruchala M. Alternative 3' acceptor site in the exon 2 of human PAX8 gene resulting in the expression of unknown mRNA variant found in thyroid hemiogenesis and some types of cancers. *Acta Biochim Pol.* 2013;60(4):573–578.
125. Fernández LP, López-Márquez A, Santisteban P. Thyroid transcription factors in development, differentiation and disease. *Nat Rev Endocrinol.* 2015;11(1):29–42.
126. Ramos HE, Nesi-França S, Boldarine VT, Pereira RM, Chiamolera MI, Camacho CP, Graf H, de Lacerda L, Carvalho GA, Maciel RM. Clinical and molecular analysis of thyroid hypoplasia: a population-based approach in southern Brazil. *Thyroid.* 2009;19(1):61–68.
127. Wang YK, Samos CH, Peoples R, Perez-Jurado LA, Nusse R, Francke U. A novel human homologue of the Drosophila frizzled wnt receptor gene binds wingless protein and is in the Williams

- syndrome deletion at 7q11.23. *Hum Mol Genet.* 1997;6(3): 465–472.
128. Meng X, Lu X, Li Z, Green ED, Massa H, Trask BJ, Morris CA, Keating MT. Complete physical map of the common deletion region in Williams syndrome and identification and characterization of three novel genes. *Hum Genet.* 1998;103(5): 590–599.
129. Kruszka P, Hart RA, Hadley DW, Muenke M, Habal MB. Expanding the phenotypic expression of Sonic Hedgehog mutations beyond holoprosencephaly. *J Craniofac Surg.* 2015;26(1): 3–5.
130. Stagi S, Lapi E, Gambineri E, Salti R, Genuardi M, Colarusso G, Conti C, Jenuso R, Chiarelli F, Azzari C, de Martino M. Thyroid function and morphology in subjects with microdeletion of chromosome 22q11 (del(22)(q11)). *Clin Endocrinol (Oxf).* 2010; 72(6):839–844.
131. Abramowicz MJ, Duprez L, Parma J, Vassart G, Heinrichs C. Familial congenital hypothyroidism due to inactivating mutation of the thyrotropin receptor causing profound hypoplasia of the thyroid gland. *J Clin Invest.* 1997;99(12):3018–3024.
132. Deladoëy J, Vassart G, Van Vliet G. Possible non-Mendelian mechanisms of thyroid dysgenesis. *Endocr Dev.* 2007;10:29–42.
